# Supplementary material for: Colon Cancer Tumorigenesis Initiated by the H1047R Mutant PI3K
Source: PubMed Central journal article supplement (PMC4749659; doi:10.1371/journal.pone.0148730), 2016-02-10

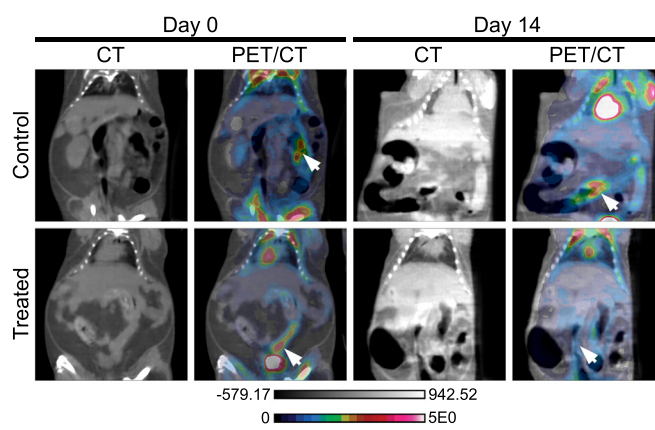

Supplement: pone.0148730.s001.pdf [file pone.0148730.s001.pdf]
