# Supplementary material for: Colon Cancer Tumorigenesis Initiated by the H1047R Mutant PI3K
Source: PubMed Central journal article supplement (PMC4749659; doi:10.1371/journal.pone.0148730), 2016-02-10
Supplement: pone.0148730.s002.pdf [file pone.0148730.s002.pdf]

**S1 Table. Comparison of mouse models.**

| Mice                                                                  | Small intestinal tumor count                     | Colon tumor count                                     | Tumors progressing to cancer | Lifespan                                 |
|-----------------------------------------------------------------------|--------------------------------------------------|-------------------------------------------------------|------------------------------|------------------------------------------|
| C57BL/6J<br><i>Apc</i> <sup>Min/+</sup>                               | 92 ± 4 (males)<br>103 ± 4 (females) <sup>a</sup> | 2.9 ± 0.2 (males)<br>1.6 ± 0.1 (females) <sup>a</sup> | 0% <sup>b</sup>              | Rarely survive beyond 120d <sup>c</sup>  |
| (FVB x B6)F1<br><i>Fc</i> <sup>+</sup> <i>Pik3ca</i> <sup>p110*</sup> | None <sup>d</sup>                                | 1.4 <sup>d</sup>                                      | 100% <sup>e</sup>            | Majority moribund at 40-60d <sup>e</sup> |
| FVB<br><i>Fc</i> <sup>+</sup> <i>Pik3ca</i> <sup>H1047R</sup>         | None <sup>f</sup>                                | 1.2 ± 1.4 <sup>f</sup>                                | 100% <sup>f</sup>            | >150d <sup>f</sup>                       |

<sup>a</sup>Amos-Landgraf JM et al., Proc Natl Acad Sci USA 2014;111:16514-9. Data shown as mean ± SEM.

<sup>b</sup>Halberg RB et al., Cancer Res 2009;69:5768-75.

<sup>c</sup>Moser AR et al., Science 1990;247:322-4.

<sup>d</sup>Deming DA et al., Oncogene 2014;33:2245-54. Colon tumor count presented is the mean.

<sup>e</sup>Leystra AA et al., Cancer Res 2012;72:293106.

<sup>f</sup>This study. Colon tumor count shown as mean ± SD.
